# Supplementary material
Source: PubMed Central journal article supplement (PMC4694226)
Supplement: ijcem0008-17343-f8.pdf [file ijcem0008-17343-f8.pdf]

# TAP vs LA wound infiltration for postoperative analgesia

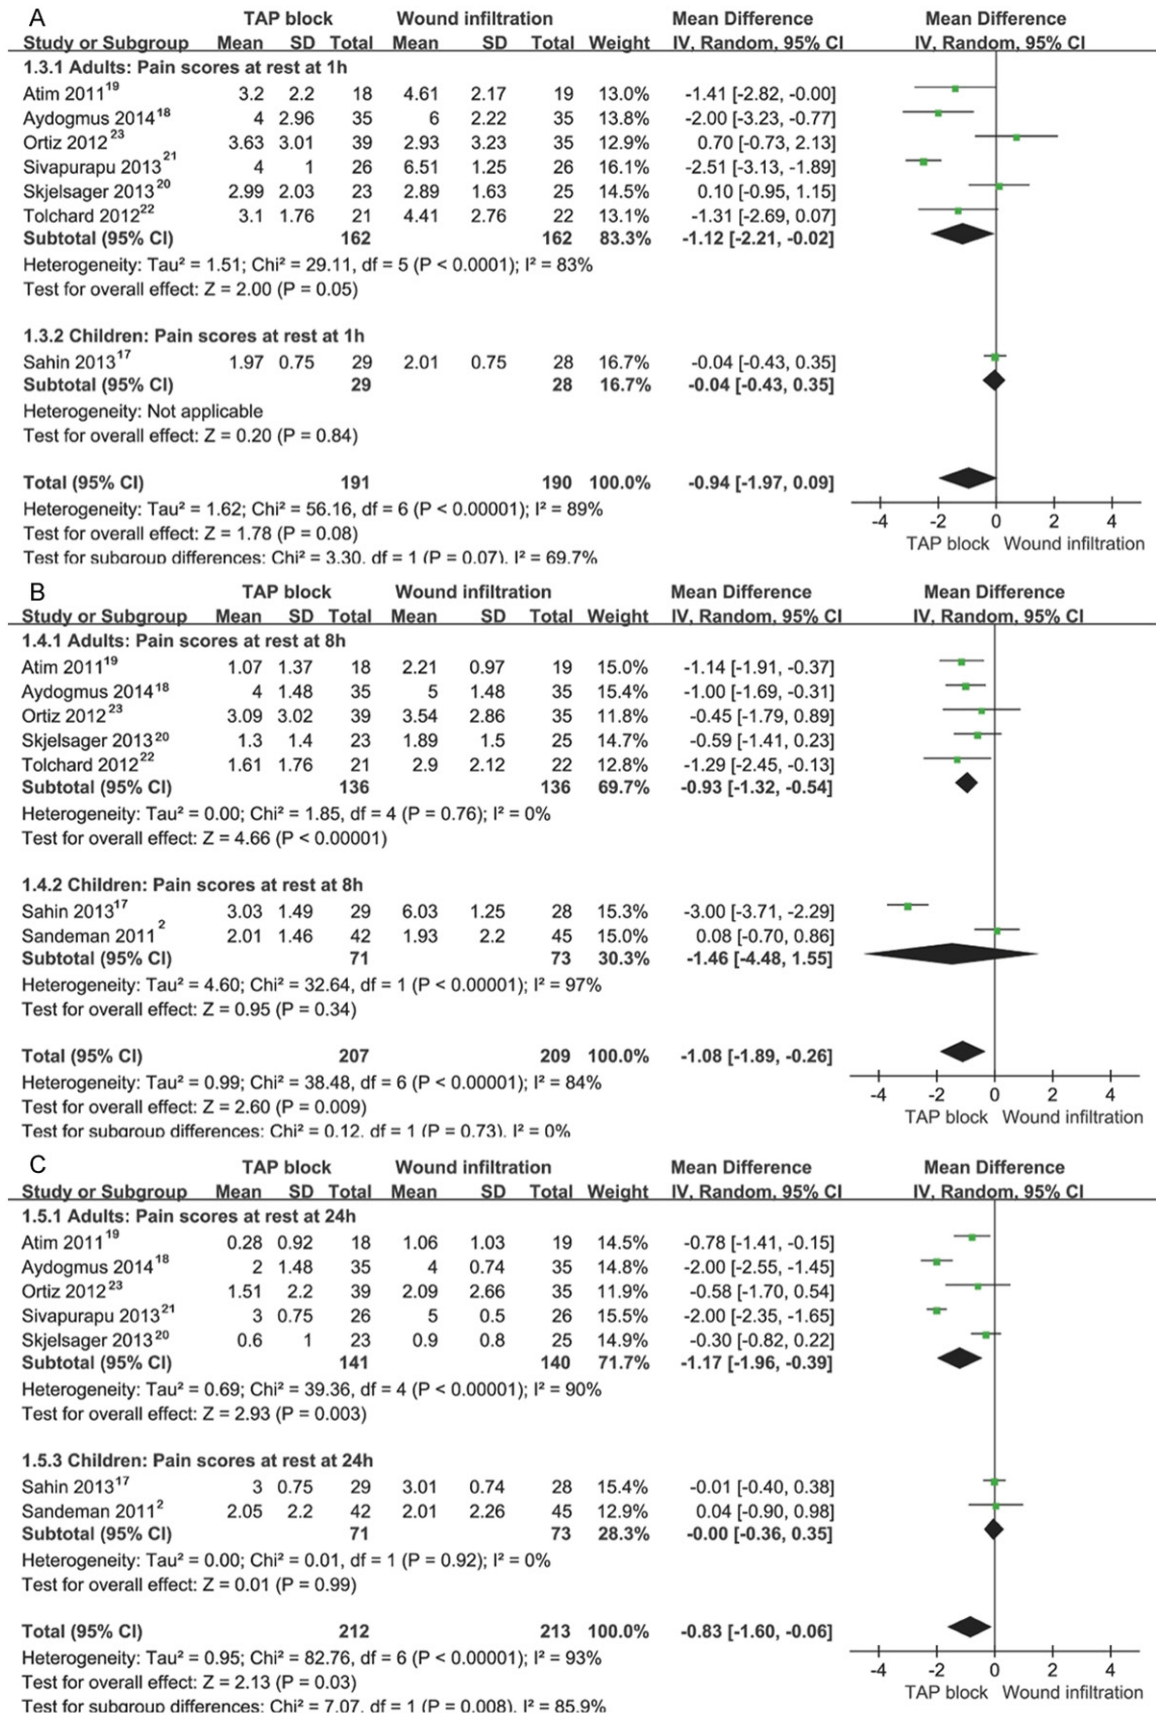

**Supplementary Figure 1.** Subgroup analysis of different participants (adults vs children) in rest pain scores at 1 hour (A), 8 hour (B) and 24 hour (C) postoperatively.

## TAP vs LA wound infiltration for postoperative analgesia

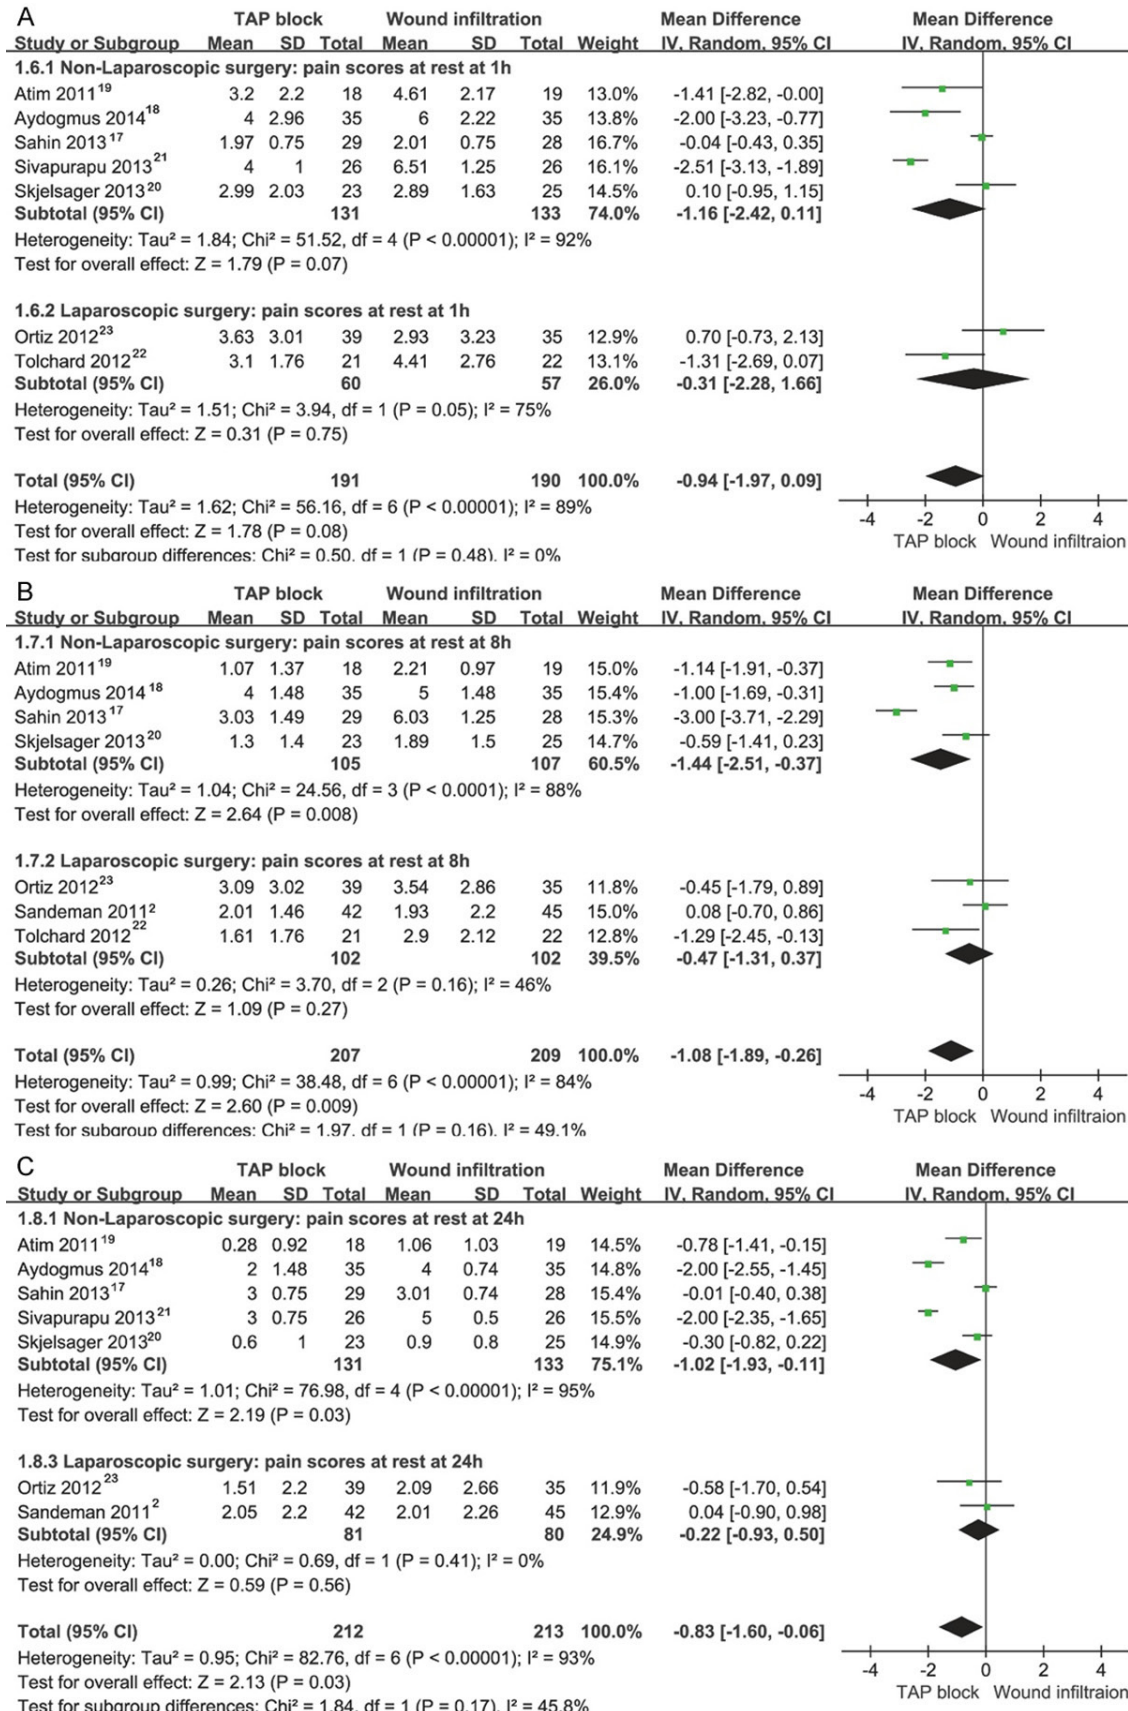

**Supplementary Figure 2.** Subgroup analysis of different types of surgery (non-laparoscopic vs laparoscopic) in rest pain scores at 1 hour (A), 8 hour (B) and 24 hour (C) postoperatively.

## TAP vs LA wound infiltration for postoperative analgesia

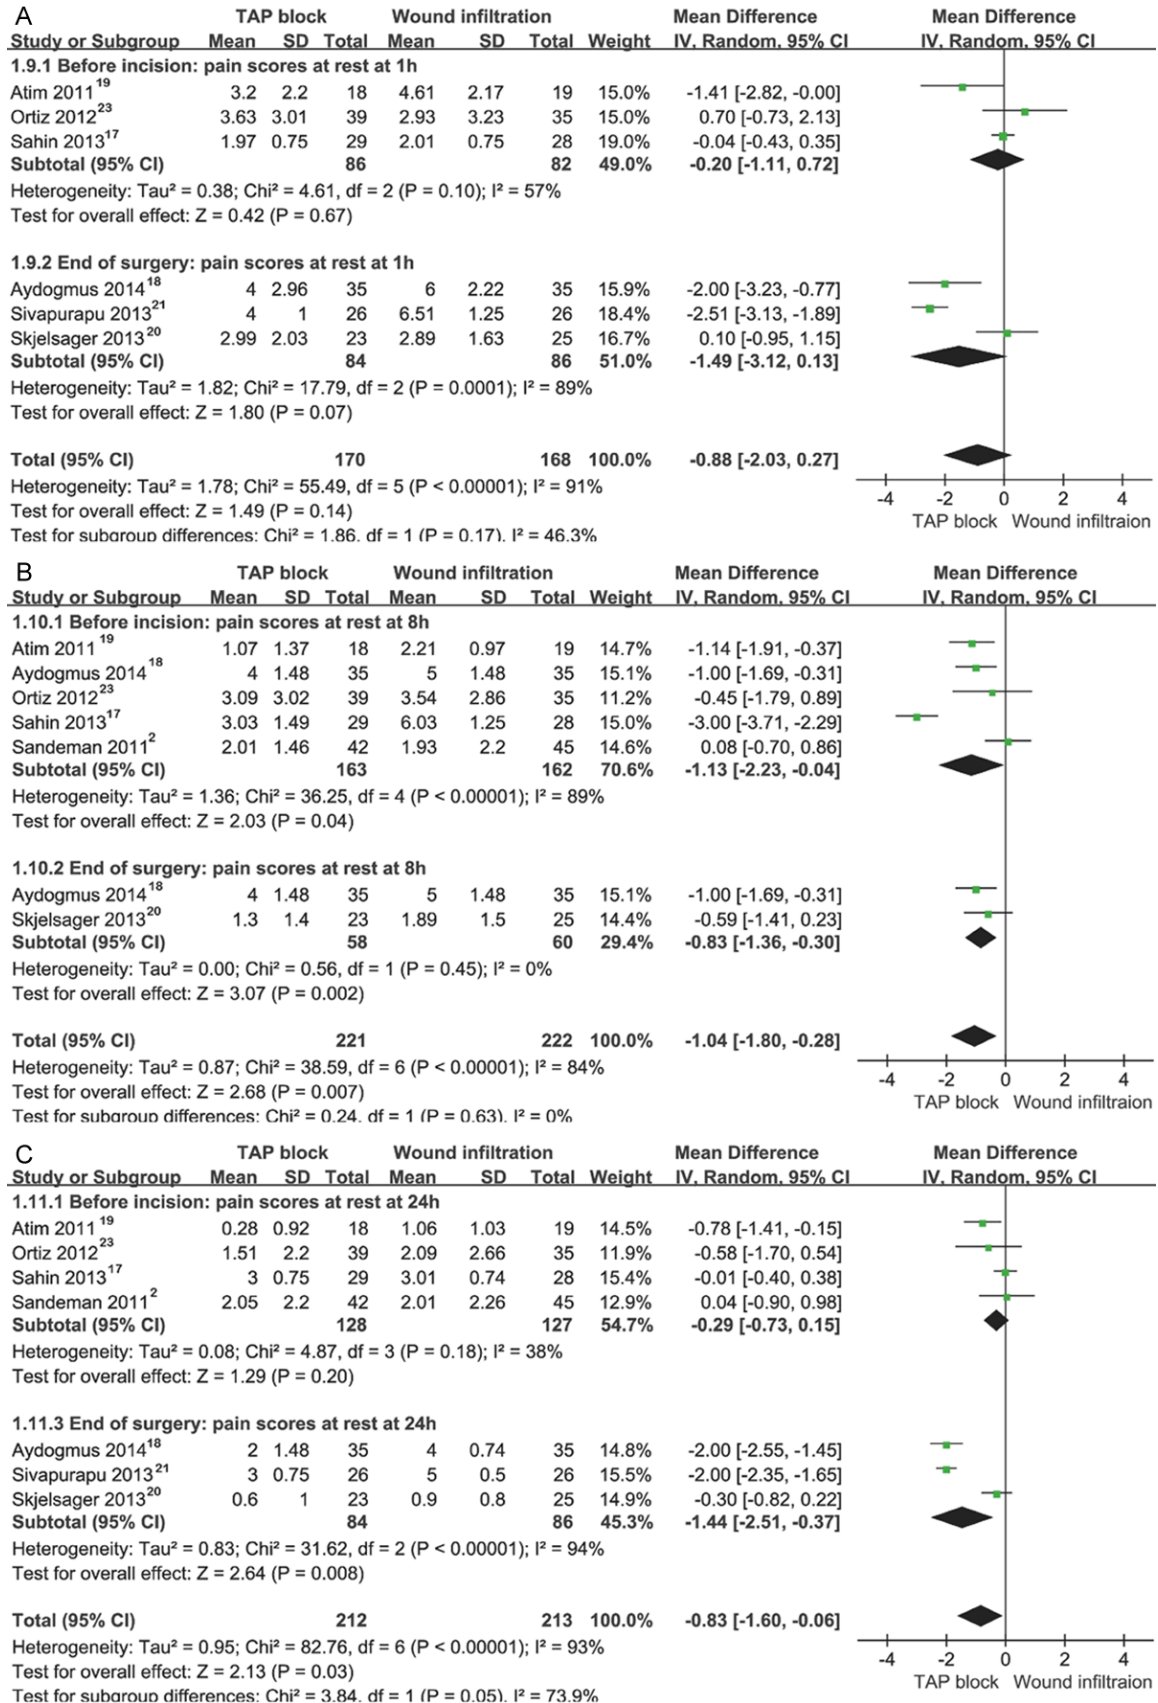

**Supplementary Figure 3.** Subgroup analysis of different time TAP block performed (before incision vs end of surgery) in rest pain scores at 1 hour (A), 8 hour (B) and 24 hour (C) postoperatively.



## TAP vs LA wound infiltration for postoperative analgesia

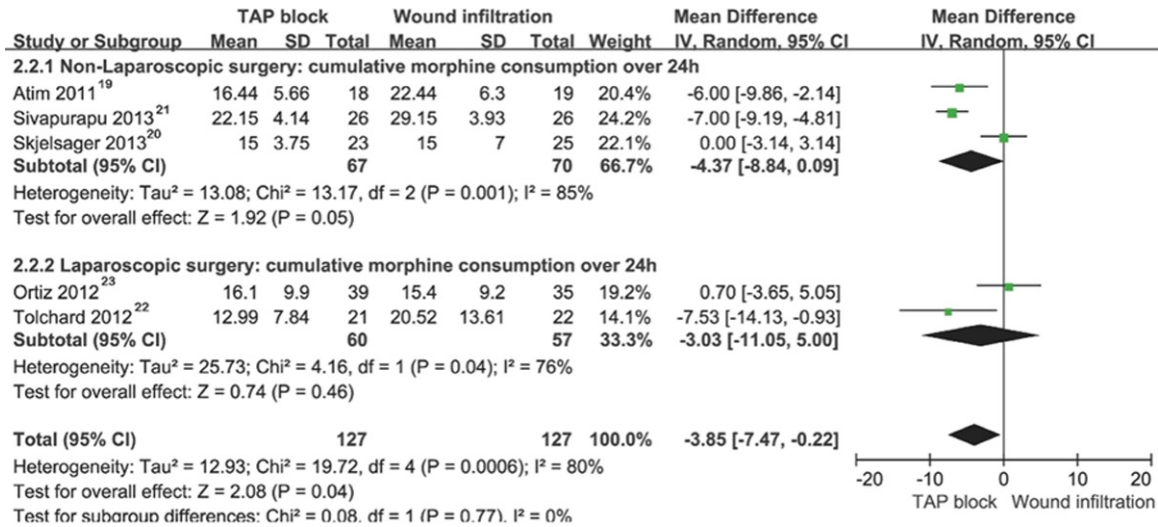

**Supplementary Figure 4.** Subgroup analysis of different types of surgery (non-laparoscopic vs laparoscopic) in cumulative morphine consumption over 24 hour.

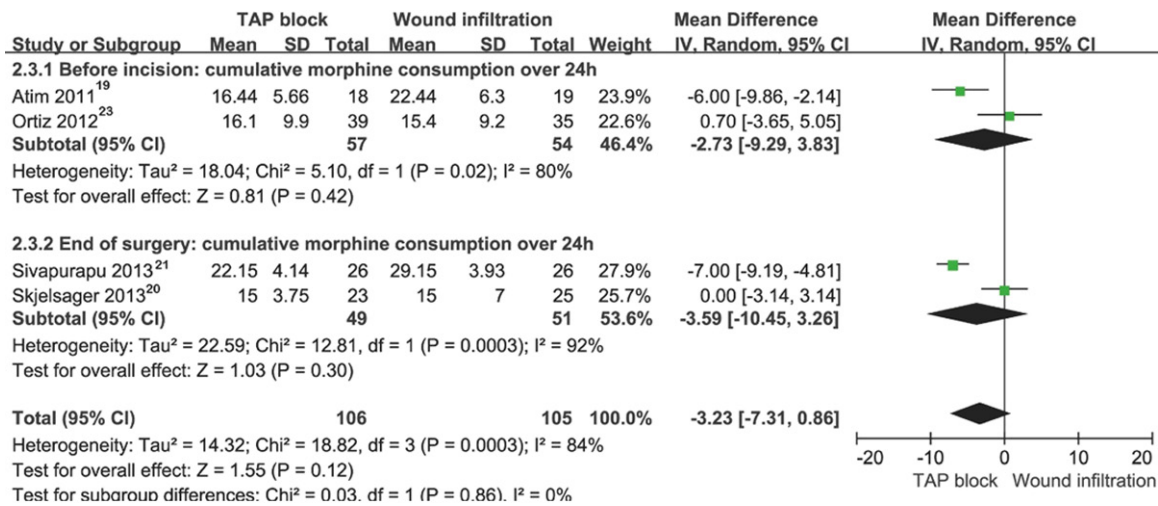

**Supplementary Figure 5.** Subgroup analysis of different time TAP block performed (before incision vs end of surgery) in cumulative morphine consumption over 24 hour.
